# Supplementary material for: Two unique (4,5,6)-connected 2D CdII coordination polymers based on the 5-nitro-1,2,3-benzenetricarboxylate ligand
Source: Royal Society of Chemistry journal article supplement (doi:10.1039/c1ra00119a), 2011-01-01
Supplement: c1ra00119a.pdf [file c1ra00119a.pdf]

## *Electronic Supplementary Information*

### **Two unique (4,5,6)-connected 2D Cd<sup>II</sup> coordination polymers based on 5-nitro-1,2,3-benzenetricarboxylic acid ligand**

*Lu-Fang Ma<sup>a,b</sup>, Jian-Hua Qin<sup>a</sup>, Li-Ya Wang<sup>a\*</sup>, Dong-Sheng Li<sup>b\*</sup>*

<sup>a</sup>*College of Chemistry and Chemical Engineering, Luoyang Normal University, Luoyang 471022, China;*

<sup>b</sup>*College of Mechanical & Material Engineering, Functional Materials Research Institute, China Three Gorges  
University, Yichang 443002, China.*

*To whom correspondence should be addressed.*

*E-mail address: wlya@lynu.edu.cn (L.-Y. Wang), Tel./Fax: +86-379-65511205*

*lidongsheng1@126.com (D.-S. Li), Tel./Fax: +86-717-6397516*

***RSC Advances***

**X-ray crystallography.** Single crystal X-ray diffraction analyses of the two complexes were carried out on a Bruker SMART APEX II CCD diffractometer equipped with a graphite-monochromated Mo K $\alpha$  radiation ( $\lambda = 0.71073\text{\AA}$ ) by using the  $\varphi/\omega$  scan technique at room temperature. The structures were solved by direct methods with SHELXS-97. Empirical absorption corrections were applied with SADABS program. All non-hydrogen atoms were refined anisotropically. The hydrogen atoms were assigned with common isotropic displacement factors and included in the final refinement by use of geometrical restraints. A full-matrix least-squares refinement on F2 was carried out using SHELXL-97. In the structure of **2**, the disordered carbon atoms and nitrogen atoms of 1,1'-(1,4-butanediyl)bis(imidazole) groups were restrained in order to obtain reasonable thermal parameters.

**Table S1** Selected bond lengths ( $\text{\AA}$ ) and angles ( $^\circ$ ) for **1** and **2**.

| <b>1</b>      |            |                      |           |
|---------------|------------|----------------------|-----------|
| Cd(1)-O(5)#1  | 2.2675(16) | O(4)#2-Cd(2)-O(18)   | 147.27(6) |
| Cd(1)-O(10)   | 2.2724(16) | O(11)-Cd(2)-O(18)    | 76.98(5)  |
| Cd(1)-O(1)    | 2.3044(16) | O(1)-Cd(2)-O(18)     | 71.83(5)  |
| Cd(1)-O(12)#1 | 2.3356(15) | O(19)-Cd(2)-O(11)#3  | 96.92(6)  |
| Cd(1)-O(17)   | 2.3919(16) | O(4)#2-Cd(2)-O(11)#3 | 90.86(6)  |
| Cd(2)-O(19)   | 2.3241(19) | O(11)-Cd(2)-O(11)#3  | 70.70(6)  |
| Cd(2)-O(4)#2  | 2.3307(18) | O(1)-Cd(2)-O(11)#3   | 150.61(5) |
| Cd(2)-O(11)   | 2.3451(16) | O(18)-Cd(2)-O(11)#3  | 80.35(5)  |
| Cd(2)-O(1)    | 2.3891(16) | O(19)-Cd(2)-O(3)#2   | 128.22(6) |
| Cd(2)-O(18)   | 2.3893(16) | O(4)#2-Cd(2)-O(3)#2  | 53.84(6)  |
| Cd(2)-O(11)#3 | 2.4731(16) | O(11)-Cd(2)-O(3)#2   | 77.03(5)  |
| Cd(2)-O(3)#2  | 2.5363(17) | O(1)-Cd(2)-O(3)#2    | 119.19(6) |
| Cd(3)-O(20)   | 2.2875(18) | O(18)-Cd(2)-O(3)#2   | 152.32(5) |
| Cd(3)-O(2)    | 2.3392(16) | O(11)#3-Cd(2)-O(3)#2 | 82.25(5)  |
| Cd(3)-O(14)#1 | 2.3816(19) | O(20)-Cd(3)-O(2)     | 149.46(6) |
| Cd(3)-O(12)   | 2.4121(16) | O(20)-Cd(3)-O(14)#1  | 71.26(6)  |
| Cd(3)-O(13)#1 | 2.4175(17) | O(2)-Cd(3)-O(14)#1   | 134.34(6) |
| Cd(3)-O(17)#2 | 2.4300(16) | O(20)-Cd(3)-O(12)    | 87.89(6)  |

|                     |            |                     |            |
|---------------------|------------|---------------------|------------|
| Cd(3)-O(6)#4        | 2.5893(19) | O(2)-Cd(3)-O(12)    | 86.68(5)   |
| O(5)#1-Cd(1)-O(10)  | 156.21(7)  | O(14)#1-Cd(3)-O(12) | 125.55(6)  |
| O(5)#1-Cd(1)-O(1)   | 101.38(6)  | O(20)-Cd(3)-O(13)#1 | 125.83(6)  |
| <b>2</b>            |            |                     |            |
| Cd(1)-O(4)#1        | 2.2172(19) | Cd(1)-O(4)          | 2.6237(18) |
| Cd(1)-N(5')#2       | 2.228(2)   | Cd(2)-N(2)          | 2.280(2)   |
| Cd(1)-N(5)#2        | 2.228(2)   | Cd(2)-N(2)#4        | 2.280(2)   |
| Cd(1)-O(2)#3        | 2.3008(19) | Cd(2)-O(6)          | 2.3394(18) |
| Cd(1)-O(5)          | 2.334(2)   | Cd(2)-O(6)#4        | 2.3394(18) |
| Cd(1)-O(1)#3        | 2.474(2)   | Cd(2)-O(9)          | 2.367(2)   |
| Cd(2)-O(9)#4        | 2.367(2)   | O(2)#3-Cd(1)-O(4)   | 149.86(7)  |
| O(6)-Cd(2)-O(9)     | 90.87(7)   | O(5)-Cd(1)-O(4)     | 73.19(6)   |
| O(6)#5-Cd(2)-O(9)   | 89.12(7)   | O(1)#3-Cd(1)-O(4)   | 138.19(7)  |
| N(2)-Cd(2)-O(9)#4   | 93.22(8)   | N(2)-Cd(2)-N(2)#4   | 179.999(1) |
| N(2)#4-Cd(2)-O(9)#4 | 86.78(8)   | N(2)-Cd(2)-O(6)     | 88.87(8)   |
| O(4)#1-Cd(1)-N(5)#2 | 125.31(8)  | N(2)#4-Cd(2)-O(6)   | 91.13(8)   |
| O(4)#1-Cd(1)-O(2)#3 | 91.87(7)   | O(6)-Cd(2)-O(6)#4   | 180.0      |
| N(5)#2-Cd(1)-O(2)#3 | 132.14(8)  | N(2)-Cd(2)-O(9)     | 86.78(8)   |
| O(4)#2-Cd(1)-O(5)   | 90.01(7)   | N(2)#4-Cd(2)-O(9)   | 93.22(8)   |

Symmetry transformations used to generate equivalent atoms: #1:  $x, -y+3/2, z-1/2$ ; #2:  $x, -y+3/2, z+1/2$ ; #3:  $-x+2, -y+2, -z+2$ ; #4:  $-x+2, -y+1, -z+2$  for **1**. #1:  $-x+2, -y+1, -z+3$ ; #2:  $x+1, y, z+2$ ; #3  $x, y, z-1$ ; #4:  $-x+1, -y+1, -z+2$  for **2**.

**Table S2** Dihedral angles ( $^{\circ}$ ) between the carboxylic groups and aromatic rings of **nbta**<sup>3-</sup>.

|                                                                                                                                                                    | Outer carboxyl | Inner carboxyl | Outer carboxyl |
|--------------------------------------------------------------------------------------------------------------------------------------------------------------------|----------------|----------------|----------------|
| [Cd <sub>3</sub> ( <b>nbta</b> ) <sub>2</sub> (H <sub>2</sub> O) <sub>4</sub> ] ( <b>1</b> )                                                                       | 14.3           | 71.0           | 47.2           |
| [Cd <sub>3</sub> ( <b>nbta</b> ) <sub>2</sub> (bbi) <sub>2</sub> (H <sub>2</sub> O) <sub>2</sub> ] ( <b>2</b> )                                                    | 31.9           | 77.4           | 6.9            |
| {[Cd <sub>3</sub> ( <b>nbta</b> ) <sub>2</sub> (bpa) <sub>2</sub> ] <sub>n</sub> } <sup>11c</sup>                                                                  | 9.4            | 98.4           | 131.0          |
| {[Cd <sub>3</sub> ( <b>nbta</b> ) <sub>2</sub> (bpy) <sub>5</sub> (H <sub>2</sub> O) <sub>2</sub> ](H <sub>2</sub> O) <sub>6</sub> ] <sub>n</sub> } <sup>11d</sup> | 44.8           | 87.0           | 29.2           |
|                                                                                                                                                                    | 44.3           | 83.7           | 37.9           |

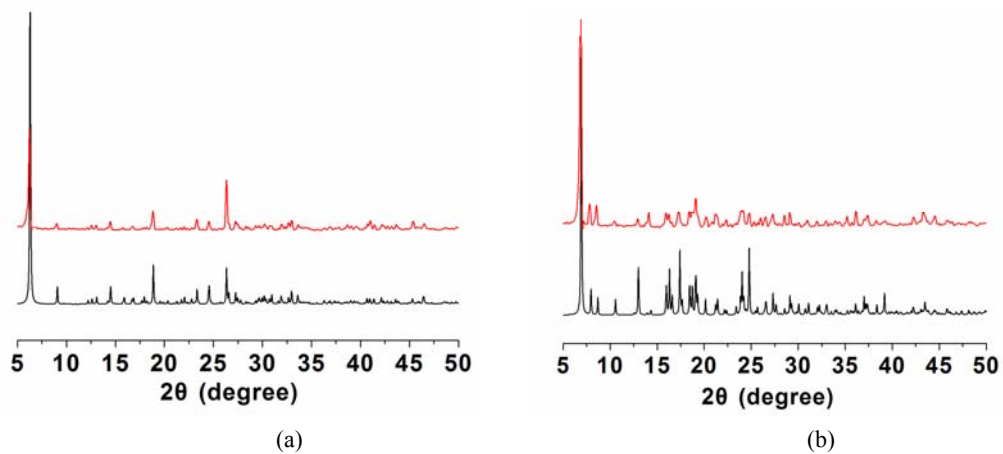

**Fig. S1.** XRPD pattern of **1** (a) and **2** (b)

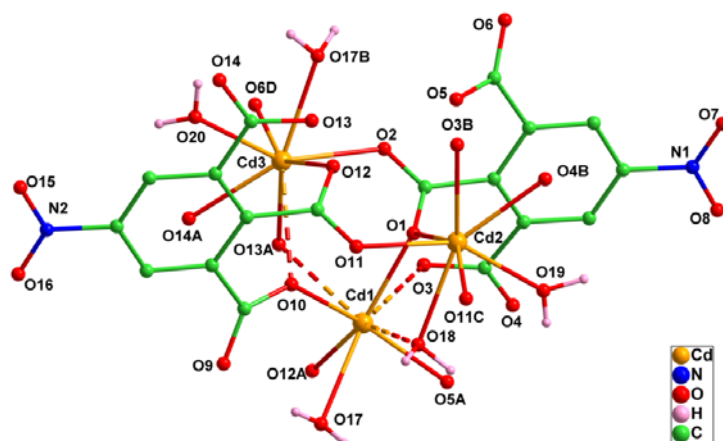

**Fig. S2.** Coordination environments of Cd(II) ions in **1**. Symmetry codes: A,  $x, -y + 3/2, z - 1/2$ ; B,  $x, -y + 3/2, z + 1/2$ ; C,  $-x + 2, -y + 2, -z + 2$ ; D,  $-x + 2, -y + 1, -z + 2$  (Only H atoms of the water molecules are shown for clarity).

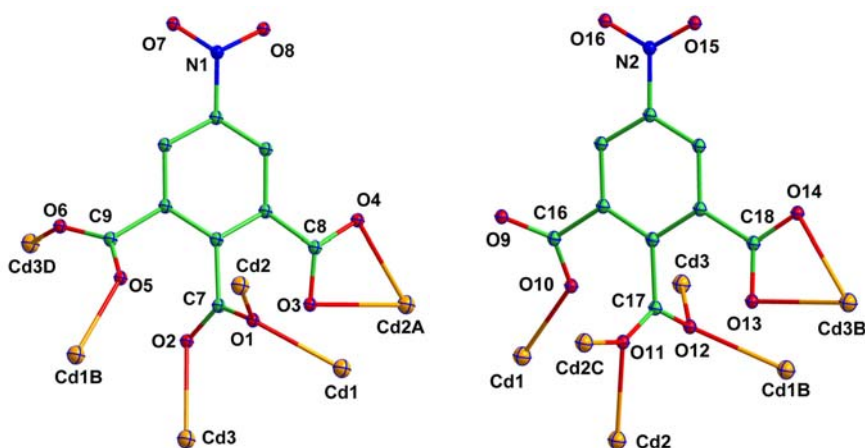

**Fig. S3.** Coordination modes of **nbta** ligand in **1** (symmetry codes: A:  $x, -y+3/2, z-1/2$ ; B:  $x, -y+3/2, z+1/2$ ; C:  $-x+2, -y+2, -z+2$ ; D:  $-x+2, -y+1, -z+2$ ).

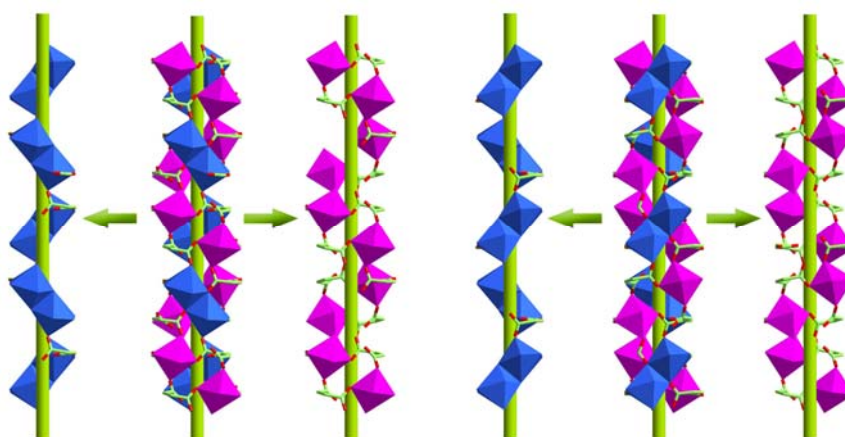

**Fig. S4.** Two intertwined left- and right-handed helices in **1**.

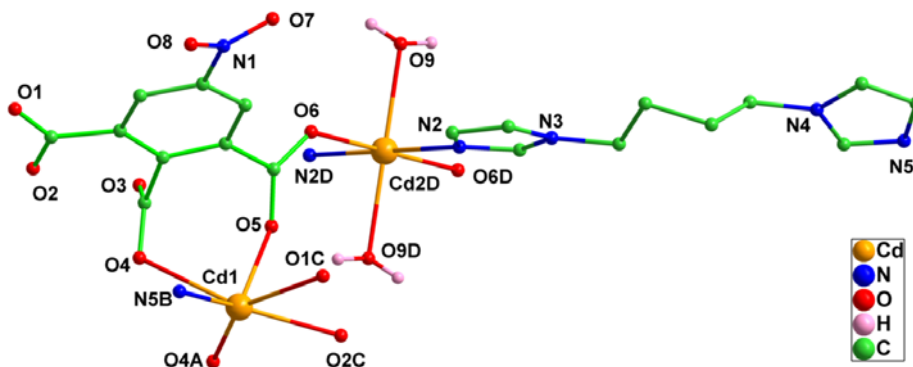

**Fig. S5.** Coordination environments of Cd(II) ions in **2**. Symmetry codes: A,  $-x + 2, -y + 1, -z + 3$ ; B,  $x + 1, y, z + 2$ ; C,  $x, y, -z + 1$ ; D,  $-x + 1, -y + 1, -z + 2$  (Only H atoms of water molecules are shown for clarity). The disordered nitrogen and carbon atoms are omitted for clarity.

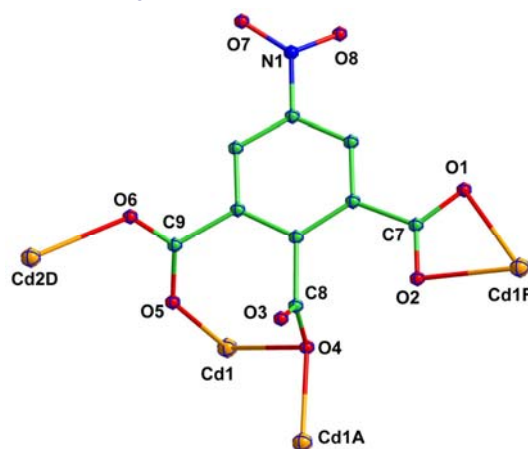

**Fig. S6.** Coordination modes of the **nbta** ligand in **2** (symmetry codes: A:  $-x+2, -y+1, -z+3$ ; B:  $x+1, y, z+2$ ; C:  $x, y, z-1$ ; D:  $-x+1, -y+1, -z+2$ ; E:  $x-1, y, z-2$ ; F:  $x, y, z+1$ ).

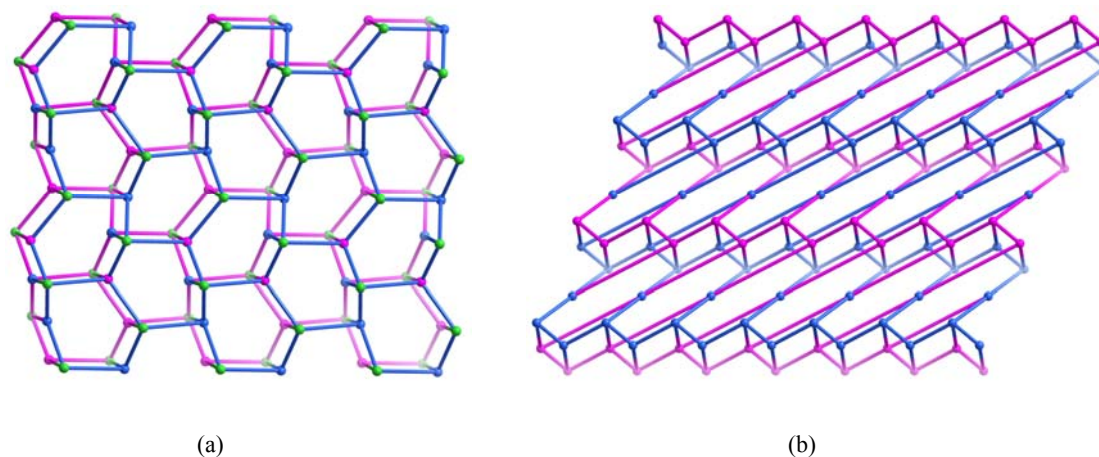

**Fig. S7.** Two 4-connected 2-D nets in **1** (a) and **2** (b), arising from the different linkages of the adjacent  $6^3$  nets (for **1**, the Cd1 nodes are ignored).

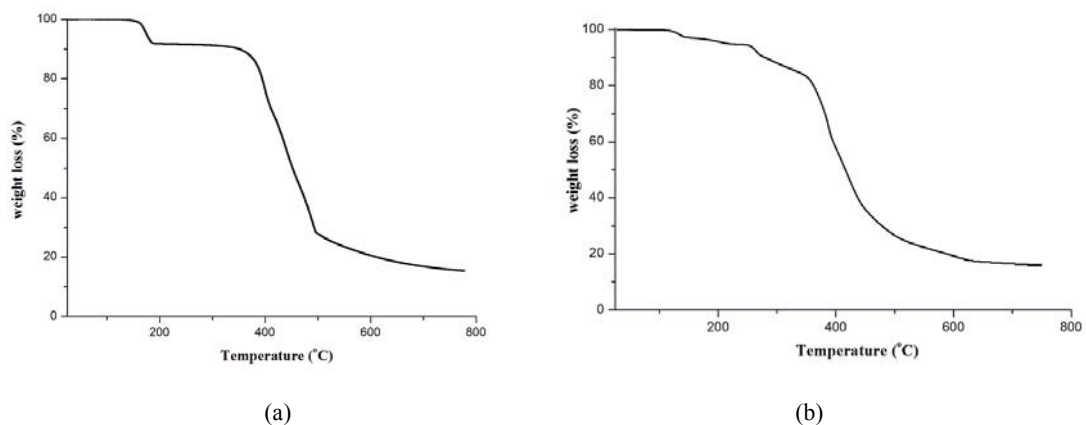

Fig. S8. TG curves of **1** (a) and **2** (b).

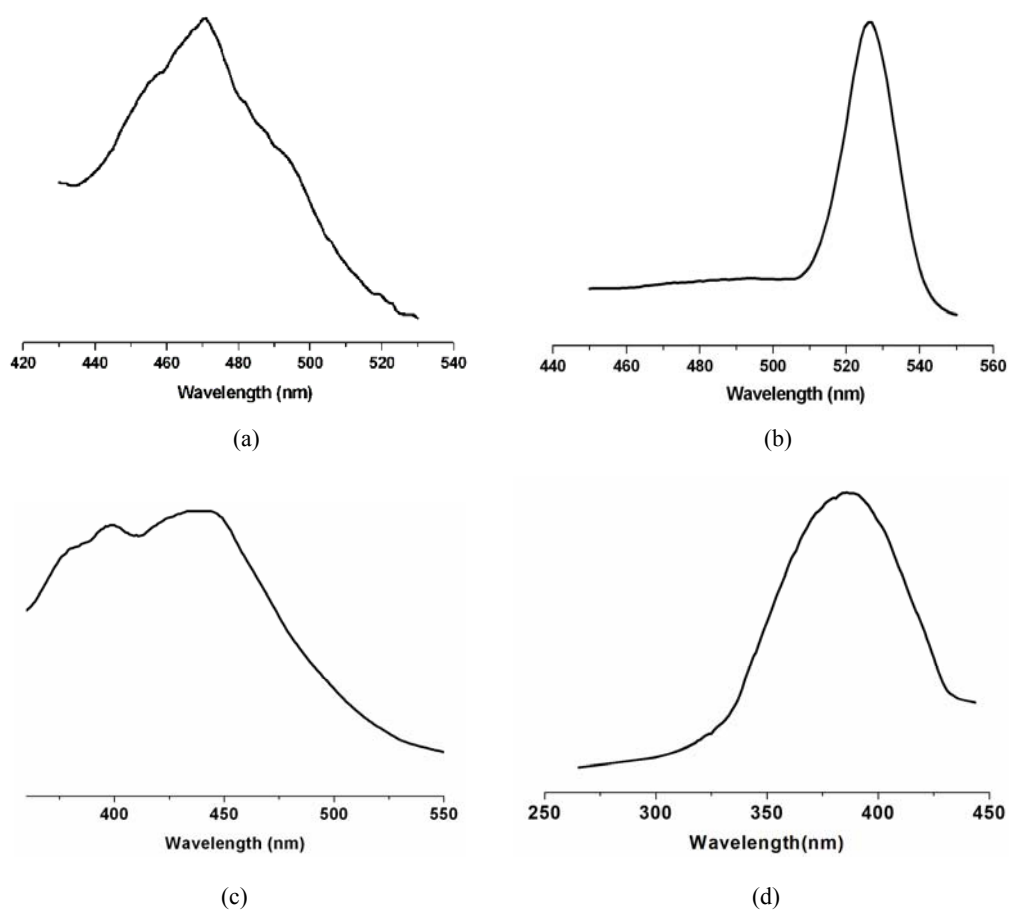

Fig. S9. Solid-state emission spectrum of **1** (a), **2** (b), H<sub>3</sub>nbta (c), and bib (d) at room temperature.
